# Supplementary material for: Potential for non-combustible nicotine products to reduce socioeconomic inequalities in smoking: a systematic review and synthesis of best available evidence
Source: PubMed Central journal article supplement (PMC6836524; doi:10.1186/s12889-019-7836-4), 2019-11-06
Supplement: 12889_2019_7836_MOESM1_ESM.pdf [file 12889_2019_7836_MOESM1_ESM.pdf]

## Additional File 1: PRISMA-E Checklist

Paper: Potential for non-combustible nicotine products to reduce socioeconomic inequalities in smoking: a systematic review and synthesis of best available evidence.

Authors: Mark Lucherini, Sarah Hill, Katherine Smith

| <b>Checklist of Items for Reporting Equity-Focused Systematic Reviews</b> |             |                                                                                                                                                                                                                                                                                                             |                                                                                                                                                                         |             |
|---------------------------------------------------------------------------|-------------|-------------------------------------------------------------------------------------------------------------------------------------------------------------------------------------------------------------------------------------------------------------------------------------------------------------|-------------------------------------------------------------------------------------------------------------------------------------------------------------------------|-------------|
| <b>Section</b>                                                            | <b>Item</b> | <b>Standard PRISMA Item</b>                                                                                                                                                                                                                                                                                 | <b>Extension for Equity-Focused Reviews</b>                                                                                                                             | <b>Pg #</b> |
| <b>Title</b>                                                              |             |                                                                                                                                                                                                                                                                                                             |                                                                                                                                                                         |             |
| <b>Title</b>                                                              | 1           | Identify the report as a systematic review, meta-analysis, or both.                                                                                                                                                                                                                                         | Identify equity as a focus of the review, if relevant, using the term equity                                                                                            | 1           |
| <b>Abstract</b>                                                           |             |                                                                                                                                                                                                                                                                                                             |                                                                                                                                                                         |             |
| <b>Structured summary</b>                                                 | 2           | Provide a structured summary including, as applicable: background; objectives; data sources; study eligibility criteria, participants, and interventions; study appraisal and synthesis methods; results; limitations; conclusions and implications of key findings; systematic review registration number. | State research question(s) related to health equity.                                                                                                                    | 1-2         |
|                                                                           | 2A          |                                                                                                                                                                                                                                                                                                             | Present results of health equity analyses (e.g. subgroup analyses or meta-regression).                                                                                  | 1-2         |
|                                                                           | 2B          |                                                                                                                                                                                                                                                                                                             | Describe extent and limits of applicability to disadvantaged populations of interest.                                                                                   | 1-2         |
| <b>Introduction</b>                                                       |             |                                                                                                                                                                                                                                                                                                             |                                                                                                                                                                         |             |
| <b>Rationale</b>                                                          | 3           | Describe the rationale for the review in the context of what is already known.                                                                                                                                                                                                                              | Describe assumptions about mechanism(s) by which the intervention is assumed to have an impact on health equity.                                                        | 3-4         |
|                                                                           | 3A          |                                                                                                                                                                                                                                                                                                             | Provide the logic model/analytical framework, if done, to show the pathways through which the intervention is assumed to affect health equity and how it was developed. | N/A         |
| <b>Objectives</b>                                                         | 4           | Provide an explicit statement of questions being addressed                                                                                                                                                                                                                                                  | Describe how disadvantage was defined if used as criterion in                                                                                                           | 4           |

|                                           |    |                                                                                                                                                                                                        |                                                                                                                                                                                      |                       |
|-------------------------------------------|----|--------------------------------------------------------------------------------------------------------------------------------------------------------------------------------------------------------|--------------------------------------------------------------------------------------------------------------------------------------------------------------------------------------|-----------------------|
|                                           |    | with reference to participants, interventions, comparisons, outcomes, and study design (PICOS).                                                                                                        | the review (e.g. for selecting studies, conducting analyses or judging applicability).                                                                                               |                       |
|                                           | 4A |                                                                                                                                                                                                        | State the research questions being addressed with reference to health equity                                                                                                         | 4                     |
| <b>Methods</b>                            |    |                                                                                                                                                                                                        |                                                                                                                                                                                      |                       |
| <b>Protocol and registration</b>          | 5  | Indicate if a review protocol exists, if and where it can be accessed (e.g., Web address), and, if available, provide registration information including registration number.                          |                                                                                                                                                                                      | 4                     |
| <b>Eligibility criteria</b>               | 6  | Specify study characteristics (e.g., PICOS, length of follow-up) and report characteristics (e.g., years considered, language, publication status) used as criteria for eligibility, giving rationale. | Describe the rationale for including particular study designs related to equity research questions.                                                                                  | 5                     |
|                                           | 6A |                                                                                                                                                                                                        | Describe the rationale for including the outcomes - e.g. how these are relevant to reducing inequity.                                                                                | 5                     |
| <b>Information sources</b>                | 7  | Describe all information sources (e.g., databases with dates of coverage, contact with study authors to identify additional studies) in the search and date last searched.                             | Describe information sources (e.g. health, non-health, and grey literature sources) that were searched that are of specific relevance to address the equity questions of the review. | 4                     |
| <b>Search</b>                             | 8  | Present full electronic search strategy for at least one database, including any limits used, such that it could be repeated.                                                                          | Describe the broad search strategy and terms used to address equity questions of the review.                                                                                         | Supplementary file    |
| <b>Study selection</b>                    | 9  | State the process for selecting studies (i.e., screening, eligibility, included in systematic review, and, if applicable, included in the meta-analysis).                                              |                                                                                                                                                                                      | 5, Supplementary file |
| <b>Data collection process</b>            | 10 | Describe method of data extraction from reports (e.g., piloted forms, independently, in duplicate) and any processes for obtaining and confirming data from investigators.                             |                                                                                                                                                                                      | 6, Supplementary file |
| <b>Data items</b>                         | 11 | List and define all variables for which data were sought (e.g., PICOS, funding sources) and any assumptions and simplifications made.                                                                  | List and define data items related to equity, where such data were sought (e.g. using PROGRESS-Plus or other criteria, context).                                                     | 6, Supplementary file |
| <b>Risk of bias in individual studies</b> | 12 | Describe methods used for assessing risk of bias of individual studies (including specification of whether this was done at the study or outcome level), and how this                                  |                                                                                                                                                                                      | 6, Supplementary file |

|                                      |    |                                                                                                                                                                                                          |                                                                                                                                            |                             |
|--------------------------------------|----|----------------------------------------------------------------------------------------------------------------------------------------------------------------------------------------------------------|--------------------------------------------------------------------------------------------------------------------------------------------|-----------------------------|
|                                      |    | information is to be used in any data synthesis.                                                                                                                                                         |                                                                                                                                            |                             |
| <b>Summary measures</b>              | 13 | State the principal summary measures (e.g., risk ratio, difference in means).                                                                                                                            |                                                                                                                                            | 7, figure 1                 |
| <b>Synthesis of results</b>          | 14 | Describe the methods of handling data and combining results of studies, if done, including measures of consistency (e.g., $I^2$ ) for each meta-analysis.                                                | Describe methods of synthesizing findings on health inequities (e.g. presenting both relative and absolute differences between groups).    | 7, Supplementary file       |
| <b>Risk of bias across studies</b>   | 15 | Specify any assessment of risk of bias that may affect the cumulative evidence (e.g., publication bias, selective reporting within studies).                                                             |                                                                                                                                            | 6, Supplementary file       |
| <b>Additional analyses</b>           | 16 | Describe methods of additional analyses (e.g., sensitivity or subgroup analyses, meta-regression), if done, indicating which were pre-specified.                                                         | Describe methods of <u>additional</u> synthesis approaches related to equity questions, if done, indicating which were pre-specified       | N/A                         |
| <b>Results</b>                       |    |                                                                                                                                                                                                          |                                                                                                                                            |                             |
| <b>Study selection</b>               | 17 | Give numbers of studies screened, assessed for eligibility, and included in the review, with reasons for exclusions at each stage, ideally with a flow diagram.                                          |                                                                                                                                            | 7-8, figure 2               |
| <b>Study characteristics</b>         | 18 | For each study, present characteristics for which data were extracted (e.g., study size, PICOS, follow-up period) and provide the citations.                                                             | Present the population characteristics that relate to the equity questions across the relevant PROGRESS-Plus or other factors of interest. | 8-11, Supplementary file    |
| <b>Risk of bias within studies</b>   | 19 | Present data on risk of bias of each study and, if available, any outcome level assessment (see item 12).                                                                                                |                                                                                                                                            | Supplementary file          |
| <b>Results of individual studies</b> | 20 | For all outcomes considered (benefits or harms), present, for each study: (a) simple summary data for each intervention group (b) effect estimates and confidence intervals, ideally with a forest plot. |                                                                                                                                            | 8-11, Supplementary file    |
| <b>Synthesis of results</b>          | 21 | Present results of each meta-analysis done, including confidence intervals and measures of consistency.                                                                                                  | Present the results of synthesizing findings on inequities (see 14).                                                                       | 8-11                        |
| <b>Risk of bias across studies</b>   | 22 | Present results of any assessment of risk of bias across studies (see Item 15).                                                                                                                          |                                                                                                                                            | 6, 8-11, Supplementary file |
| <b>Additional analysis</b>           | 23 | Give results of additional analyses, if done (e.g., sensitivity or subgroup analyses, meta-regression [see Item 16]).                                                                                    | Give the results of <u>additional</u> synthesis approaches related to equity objectives, if done, (see 16).                                | N/A                         |

|                            |     |                                                                                                                                                                                      |                                                                                                                                                         |       |
|----------------------------|-----|--------------------------------------------------------------------------------------------------------------------------------------------------------------------------------------|---------------------------------------------------------------------------------------------------------------------------------------------------------|-------|
| <b>Discussion</b>          |     |                                                                                                                                                                                      |                                                                                                                                                         |       |
| <b>Summary of evidence</b> | 24  | Summarize the main findings including the strength of evidence for each main outcome; consider their relevance to key groups (e.g., healthcare providers, users, and policy makers). |                                                                                                                                                         | 12-13 |
| <b>Limitations</b>         | 25  | Discuss limitations at study and outcome level (e.g., risk of bias), and at review-level (e.g., incomplete retrieval of identified research, reporting bias).                        |                                                                                                                                                         | 13-14 |
| <b>Conclusions</b>         | 26  | Provide a general interpretation of the results in the context of other evidence, and implications for future research.                                                              | Present extent and limits of applicability to disadvantaged populations of interest and describe the evidence and logic underlying those judgments.     | 13-14 |
|                            | 26A |                                                                                                                                                                                      | Provide implications for research, practice or policy related to equity where relevant (e.g. types of research needed to address unanswered questions). | 14    |
| <b>Funding</b>             |     |                                                                                                                                                                                      |                                                                                                                                                         |       |
| <b>Funding</b>             | 27  | Describe sources of funding for the systematic review and other support (e.g., supply of data); role of funders for the systematic review.                                           |                                                                                                                                                         | 15    |

*From:* Source: Welch V, Petticrew M, Tugwell P, Moher D, O'Neill J, Waters E, White H, and the PRISMA-Equity Bellagio Group. (2012) PRISMA-Equity 2012 Extension: Reporting Guidelines for Systematic Reviews with a Focus on Health Equity. PLoS Med 9(10): e1001333. doi:10.1371/journal.pmed.1001333
