# Supplementary material for: Potential for non-combustible nicotine products to reduce socioeconomic inequalities in smoking: a systematic review and synthesis of best available evidence
Source: PubMed Central journal article supplement (PMC6836524; doi:10.1186/s12889-019-7836-4), 2019-11-06
Supplement: 12889_2019_7836_MOESM2_ESM.pdf [file 12889_2019_7836_MOESM2_ESM.pdf]

## **Additional File 2: Example of search terms**

Paper: Potential for non-combustible nicotine products to reduce socioeconomic inequalities in smoking: a systematic review and synthesis of best available evidence.  
Authors: Mark Lucherini, Sarah Hill, Katherine Smith

### **Search terms applied in MEDLINE**

#### Smoking/tobacco/nicotine terms

smoking  
tobacco  
“tobacco use disorder”  
nicotine  
smoker OR smokers  
cigar\*

#### Non-combustible Nicotine Product Terms

smokeless  
(smokeless or smoke-less or “smoke less”) AND tobacco  
e-cig\* OR “electronic cig\*” OR electronic-cig\*  
ENDS OR “electronic nicotine delivery system\*”  
ANDS OR “alternative nicotine delivery system\*”  
snuff  
snus  
“nicotine replacement therap\*” OR NRT  
“nicotine replacement treatment\*”  
“nicotine replacement intervention\*”  
“heat not burn” OR “heat-not-burn”  
vaporiser\* OR vapouriser\* OR vaporizer\* OR vapourizer\*  
vape\* OR vaping  
(shop OR store) AND (vape\* OR vapour OR vapor)  
e-hookah\* OR “electronic hookah\*” OR electronic-hookah\*  
e-shisha\* OR “electronic shisha\*” OR electronic-shisha\*  
(nicotine OR tobacco) AND (patch\* OR gum\* OR inhaler\* OR inhalator\* OR lozenge\* OR strip\* OR stick\* OR tablet\* OR “nasal spray\*” OR “mouth spray\*” OR dissolvable OR oral OR dip\* OR chew\*)

#### Inequality terms

socioeconomic OR “socio economic” OR socio-economic  
inequal\*  
disparit\*  
depriv\*  
disadvantage\*  
educat\*  
social AND (class\* OR group\* OR grade\* OR context\* OR status)  
unemploy\*

income  
poverty  
SES  
demographic\*  
poor  
equity  
social AND (disadvant\* OR exclusion OR excluded OR depriv\*)

(Medline specific)  
exp socioeconomic factors/  
exp public assistance/  
exp social welfare/  
exp vulnerable populations/
