# Supplementary material for: Potential for non-combustible nicotine products to reduce socioeconomic inequalities in smoking: a systematic review and synthesis of best available evidence
Source: PubMed Central journal article supplement (PMC6836524; doi:10.1186/s12889-019-7836-4), 2019-11-06
Supplement: 12889_2019_7836_MOESM3_ESM.pdf [file 12889_2019_7836_MOESM3_ESM.pdf]

**Additional File 3. Data extraction and quality appraisal template**

Paper: Potential for non-combustible nicotine products to reduce socioeconomic inequalities in smoking: a systematic review and synthesis of best available evidence.

Authors: Mark Lucherini, Sarah Hill, Katherine Smith

**Bibliographic Details**

.....

**Original research aim of study**

.....

**Why study is relevant to our review** (i.e. how does the study provide evidence of differences (or lack of difference) in use or impact of NCNP by SES?)

.....

**Study details**

|                             |  |
|-----------------------------|--|
| Study design                |  |
| Study location              |  |
| Participant characteristics |  |
| Study period                |  |
| Study size                  |  |
| Type of product             |  |
| Indicators(s) of SES        |  |

**What NCNP is being examined in study?**

| Product                  | Mark 'X' if relevant | Notes |
|--------------------------|----------------------|-------|
| E-cigarettes             |                      |       |
| NRT                      |                      |       |
| Smokeless tobacco: snus  |                      |       |
| Smokeless tobacco: other |                      |       |

**How is the NCNP being examined by SES?**

| Study outcome: product use & SES                 | Mark 'X' if covered | Notes (current use, ever use etc) |
|--------------------------------------------------|---------------------|-----------------------------------|
| Prevalence of use                                |                     |                                   |
| Prevalence of NCNP use among smokers by SES      |                     |                                   |
| Distribution of user groups by SES               |                     |                                   |
| Association between SES and NCNP (no prevalence) |                     |                                   |

**Main findings of relevance for our study**

**INDIRECT EVIDENCE (PRODUCT USE): What do the study findings tell us about the use of NCNP by SES?**

.....

|             | Low SES ><br>High SES | Low SES =<br>High SES | Low SES <<br>High SES | Unclear |
|-------------|-----------------------|-----------------------|-----------------------|---------|
| Ever use    |                       |                       |                       |         |
| Current use |                       |                       |                       |         |

**What do the study findings tell us about the use of conventional tobacco by SES in this population?**

.....

|                 | Low SES ><br>High SES | Low SES =<br>High SES | Low SES <<br>High SES | Unclear | No data |
|-----------------|-----------------------|-----------------------|-----------------------|---------|---------|
| Tobacco product |                       |                       |                       |         |         |

**What do the study findings tell us about dual use (ie NCNP + conventional tobacco) by SES in this population?**

.....

|                      | Low SES ><br>High SES | Low SES =<br>High SES | Low SES <<br>High SES | Unclear | No data |
|----------------------|-----------------------|-----------------------|-----------------------|---------|---------|
| Dual use<br>(define) |                       |                       |                       |         |         |

**Anything other information about conventional tobacco use (by SES) in this population (text)?**

.....

**Critical Appraisal**

|   | Quality appraisal question                                                                                           | Evaluation | Notes |
|---|----------------------------------------------------------------------------------------------------------------------|------------|-------|
| 1 | Does the research question/aim include a primary focus on use/impacts of a NCNP by SES?                              |            |       |
| 2 | Does the methodology allow us to assess use/impacts of a NCNP by SES?                                                |            |       |
| 3 | Was the recruitment strategy appropriate? (including sample selection, response rates and follow-up, where relevant) |            |       |

|   |                                                                                                               |  |  |
|---|---------------------------------------------------------------------------------------------------------------|--|--|
| 4 | Did the study include appropriate indicators of SES?                                                          |  |  |
| 5 | Did the study include a relevant measure of NCNP use or impact?                                               |  |  |
| 6 | Were the methods of data analysis appropriate?                                                                |  |  |
| 7 | Is the study adequately powered for SES comparisons?                                                          |  |  |
| 8 | Have the authors taken into account any potential confounding factors, including age?                         |  |  |
| 9 | Can the findings (in relation to harm reduction patterns by SES) be generalised, and – if so – to what level? |  |  |

**SUMMARY**

**What might these results suggest about equity outcomes (indicate possible positive, negative, neutral or unclear outcomes)? Overall quality classification in relation to our research question (Low, Medium, High)**

.....

**Evidence tier qualification**

.....
