# Supplementary material for: Potential for non-combustible nicotine products to reduce socioeconomic inequalities in smoking: a systematic review and synthesis of best available evidence
Source: PubMed Central journal article supplement (PMC6836524; doi:10.1186/s12889-019-7836-4), 2019-11-06
Supplement: 12889_2019_7836_MOESM4_ESM.pdf [file 12889_2019_7836_MOESM4_ESM.pdf]

#### Additional File 4. Relevance of study findings table

Paper: Potential for non-combustible nicotine products to reduce socioeconomic inequalities in smoking: a systematic review and synthesis of best available evidence.

Authors: Mark Lucherini, Sarah Hill, Katherine Smith

| Tier   | Description                                                                                                                                                                                        | Specific criteria                                                                                                                                                                                                                                                                                                                                                       |
|--------|----------------------------------------------------------------------------------------------------------------------------------------------------------------------------------------------------|-------------------------------------------------------------------------------------------------------------------------------------------------------------------------------------------------------------------------------------------------------------------------------------------------------------------------------------------------------------------------|
| Tier 1 | <b>Evidence of NCNP use (prevalence) by SES</b> , with adequate power to detect differences by SES<br><b>AND</b><br><b>information on cigarette use (prevalence) by SES in the same population</b> | Cross-sectional data (including from cohort studies) demonstrating: <ul style="list-style-type: none"> <li>- Prevalence of NCNP use by SES</li> <li>- Statistically significant difference in NCNP use by SES, or sufficiently powered to confirm lack of difference</li> <li>- Prevalence of cigarette use by SES</li> </ul>                                           |
| Tier 2 | <b>Evidence of NCNP use (prevalence) by SES</b> , with adequate power to detect differences by SES, but no information on cigarette use by SES in the same population                              | Cross-sectional data (including from cohort studies) demonstrating: <ul style="list-style-type: none"> <li>- Prevalence of NCNP use by SES</li> <li>- Statistically significant difference in NCNP use by SES, or sufficiently powered to confirm lack of difference</li> </ul>                                                                                         |
| Tier 3 | <b>Indirect evidence of NCNP and cigarette use in relation to SES, but no estimates of use (prevalence) in the underlying population</b>                                                           | Cross-sectional data (including from cohort studies) demonstrating: <ul style="list-style-type: none"> <li>- Prevalence of NCNP use by SES among smokers, <i>OR</i></li> <li>- Association between SES and NCNP/tobacco use (Odds Ratios only), <i>OR</i></li> <li>- Distribution of different product user groups (smokers, e-cig users, dual users) by SES</li> </ul> |
| Tier 4 | Evidence of pattern of NCNP by SES, but no test of statistical significance / no evidence of adequate study power                                                                                  | Cross-sectional data (including from cohort studies) demonstrating: <ul style="list-style-type: none"> <li>- Prevalence of NCNP use by SES, inadequately powered</li> </ul>                                                                                                                                                                                             |

Best evidence adults include Tier 1, 2 and 3 studies of medium and higher quality.

Best evidence for young people includes only Tier 1 studies of high or medium quality (ie studies must include evidence on tobacco use by SES in the same population).
