# Supplementary material for: Potential for non-combustible nicotine products to reduce socioeconomic inequalities in smoking: a systematic review and synthesis of best available evidence
Source: PubMed Central journal article supplement (PMC6836524; doi:10.1186/s12889-019-7836-4), 2019-11-06
Supplement: 12889_2019_7836_MOESM5_ESM.pdf [file 12889_2019_7836_MOESM5_ESM.pdf]

## Additional File 5. Quality appraisal appendix

Paper: Potential for non-combustible nicotine products to reduce socioeconomic inequalities in smoking: a systematic review and synthesis of best available evidence.

Authors: Mark Lucherini, Sarah Hill, Katherine Smith

| <b>Study</b>         | <b>Tobacco products by SES?*</b> | <b>Recruitment? **</b> | <b>Appropriate indicators of SES? +</b> | <b>NCNP use? ++</b> | <b>Data analysis appropriate? +++</b> | <b>Adequate study power? **++</b> | <b>Confounding factors taken into account? ***</b> | <b>Generalisability<sup>†</sup></b> | <b>Quality appraisal</b> |
|----------------------|----------------------------------|------------------------|-----------------------------------------|---------------------|---------------------------------------|-----------------------------------|----------------------------------------------------|-------------------------------------|--------------------------|
| Acortt et al 2005    | No                               | Yes                    | Yes                                     | Partially           | Yes                                   | Partially                         | Yes                                                | National                            | Medium                   |
| Agaku et al 2014     | Yes                              | Partially              | Yes                                     | Yes                 | Partially                             | Partially                         | No                                                 | National                            | Low                      |
| Alberg et al 2005    | No                               | Partially              | Yes                                     | Partially           | Partially                             | No                                | No                                                 | Regional, subpopulation             | Low                      |
| *Babineau et al 2015 | No                               | Yes                    | Partially                               | Yes                 | Yes                                   | Partially                         | Yes                                                | National, subpopulation             | Low                      |
| Backinger et al 2008 | No                               | Yes                    | Yes                                     | Partially           | Partially                             | Unclear                           | No                                                 | National, subpopulation             | Low                      |
| **Bhattacharyya 2012 | No                               | Yes                    | Unclear                                 | Yes                 | Yes                                   | Unclear                           | Unclear                                            | National                            | Low                      |
| Beiner et al 2011    | No                               | Yes                    | Partially                               | Partially           | Yes                                   | Partially                         | Partially                                          | National                            | Medium                   |
| Brown et al 2014     | Yes                              | Partially              | Partially                               | Yes                 | Yes                                   | Yes                               | Yes                                                | Unclear                             | Medium                   |

| <b>Study</b>                   | <b>Tobacco products by SES?*</b> | <b>Recruitment? **</b> | <b>Appropriate indicators of SES? +</b> | <b>NCNP use? ++</b> | <b>Data analysis appropriate? +++</b> | <b>Adequate study power? **+++</b> | <b>Confounding factors taken into account? ***</b> | <b>Generalisability<sub>H</sub></b> | <b>Quality appraisal</b> |
|--------------------------------|----------------------------------|------------------------|-----------------------------------------|---------------------|---------------------------------------|------------------------------------|----------------------------------------------------|-------------------------------------|--------------------------|
| Carrieri and Jones 2016        | Yes                              | Yes                    | Yes                                     | Partially           | Yes                                   | Yes                                | Yes                                                | National                            | Medium                   |
| Chang et al 2016               | No                               | Yes                    | Yes                                     | Yes                 | Yes                                   | Yes                                | Yes                                                | National, Subpopulation             | Medium                   |
| **Chivers et al 2016           | Yes                              | Partially              | Yes                                     | No                  | Yes                                   | Partially                          | Yes                                                | Not generalisable                   | Low                      |
| Christensen et al 2014         | Yes                              | Yes                    | Yes                                     | Yes                 | Partially                             | Unclear                            | Partially                                          | Not generalisable                   | Low                      |
| Clare et al 2014               | Yes                              | Yes                    | Yes                                     | Partially           | Yes                                   | Yes                                | Yes                                                | National                            | Medium                   |
| **Dauptch<br>eva et al<br>2013 | Yes                              | Partially              | Partially                               | Partially           | Partially                             | Unclear                            | Unclear                                            | Not generalisable                   | Low                      |
| Engstrom et al (2010)          | Yes                              | Yes                    | Yes                                     | Yes                 | Yes                                   | Partially                          | Yes                                                | National                            | Medium                   |
| *Fischer et al 2014            | No                               | Partially              | Partially                               | Yes                 | Yes                                   | Unclear                            | Yes                                                | Subpopulation                       | Low                      |
| Gallus et al 2014              | Yes                              | Yes                    | Partially                               | Yes                 | No                                    | No                                 | Yes                                                | Not generalisable                   | Low                      |
| *Grotvedt et al 2008           | Yes                              | Yes                    | Yes                                     | Yes                 | Yes                                   | Yes                                | Yes                                                | National, Subpopulation             | Medium                   |
| **Hill et al 1992              | No                               | Yes                    | Partially                               | Yes                 | Yes                                   | Partially                          | Unclear                                            | Regional, Subpopulation             | Low                      |

| <b>Study</b>         | <b>Tobacco products by SES?*</b> | <b>Recruitment? **</b> | <b>Appropriate indicators of SES? +</b> | <b>NCNP use? ++</b> | <b>Data analysis appropriate? +++</b> | <b>Adequate study power? **+++</b> | <b>Confounding factors taken into account? ***</b> | <b>Generalisability<sup>+</sup></b> | <b>Quality appraisal</b> |
|----------------------|----------------------------------|------------------------|-----------------------------------------|---------------------|---------------------------------------|------------------------------------|----------------------------------------------------|-------------------------------------|--------------------------|
| Hu et al 2016        | Yes                              | Partially              | Yes                                     | Yes                 | Yes                                   | Yes                                | No                                                 | National                            | Medium                   |
| Huang et al 2016     | Yes                              | Yes                    | Yes                                     | Yes                 | Yes                                   | Yes                                | Yes                                                | National                            | High                     |
| *Khoury et al 2016   | No                               | Yes                    | Yes                                     | Yes                 | Unclear                               | Unclear                            | Yes                                                | Regional                            | Low                      |
| **King et al 2013    | No                               | Yes                    | Yes                                     | Partially           | Partially                             | Partially                          | Unclear                                            | National                            | Low                      |
| King et al 2015      | No                               | Yes                    | Yes                                     | Yes                 | Yes                                   | No                                 | Yes                                                | National                            | Low                      |
| *Kinnunen et al 2016 | No                               | Partially              | Yes                                     | Yes                 | Yes                                   | Yes                                | Yes                                                | Subpopulation                       | Medium                   |
| Kotz and West 2009   | No                               | Yes                    | Yes                                     | Yes                 | Partially                             | Yes                                | No                                                 | National                            | Medium                   |
| Kushnir et al 2017   | Yes                              | Partially              | Partially                               | Yes                 | Partially                             | Unclear                            | No                                                 | National                            | Low                      |
| Kvaavik et al 2016   | Yes                              | Partially              | Yes                                     | Yes                 | Yes                                   | Yes                                | Yes                                                | National, subpopulation             | Medium                   |
| McMillen et al 2012  | No                               | Yes                    | Yes                                     | Partially           | Partially                             | No                                 | No                                                 | National                            | Low                      |
| Mazurek et al 2014   | Yes                              | Yes                    | Yes                                     | Yes                 | Yes                                   | Yes                                | Unclear                                            | Subpopulation                       | Medium                   |
| Mushtaq et al 2012   | Yes                              | Yes                    | Yes                                     | Yes                 | Yes                                   | Partially                          | Yes                                                | National                            | Medium                   |

| <b>Study</b>                 | <b>Tobacco products by SES?*</b> | <b>Recruitment?***</b> | <b>Appropriate indicators of SES?+</b> | <b>NCNP use?++</b> | <b>Data analysis appropriate?+++</b> | <b>Adequate study power? **+++</b> | <b>Confounding factors taken into account?***</b> | <b>Generalisability<sub>H</sub></b> | <b>Quality appraisal</b> |
|------------------------------|----------------------------------|------------------------|----------------------------------------|--------------------|--------------------------------------|------------------------------------|---------------------------------------------------|-------------------------------------|--------------------------|
| Nelson et al 1996            | No                               | Yes                    | Yes                                    | Yes                | Yes                                  | No                                 | Yes                                               | Regional/Subpopulation              | Low                      |
| Norberg et al 2011           | No                               | Partially              | Yes                                    | Partially          | Yes                                  | Yes                                | Yes                                               | Regional, subpopulation             | Medium                   |
| Novotny et al 1989           | No                               | Yes                    | Yes                                    | Yes                | Yes                                  | Partially                          | Unclear                                           | National, Subpopulation             | Medium                   |
| *Overland et al 2010         | Yes                              | Yes                    | Yes                                    | Yes                | Yes                                  | Partially                          | Yes                                               | National, Subpopulation             | Medium                   |
| Pearson et al 2012           | Yes                              | Yes                    | Yes                                    | Partially          | Yes                                  | Yes                                | Yes                                               | National                            | Medium                   |
| *Pedersen and Von Soest 2014 | Yes                              | Yes                    | Yes                                    | Yes                | Partially                            | No                                 | Yes                                               | National, Subpopulation             | Low                      |
| *Pedersen and Bakken 2016    | Yes                              | Yes                    | Yes                                    | Yes                | Yes                                  | Yes                                | Yes                                               | Regional, subpopulation             | High                     |
| Regan et al 2013             | No                               | Partially              | Yes                                    | Yes                | Yes                                  | Yes                                | No                                                | National                            | Low                      |
| *Rennie et al 2016           | Yes                              | Partially              | Partially                              | Partially          | Yes                                  | Yes                                | Yes                                               | Regional/Subpopulation              | Medium                   |
| Roberts et al 2016           | Yes                              | Yes                    | Yes                                    | Partially          | No                                   | No                                 | No                                                | National                            | Low                      |

| <b>Study</b>              | <b>Tobacco products by SES?*</b> | <b>Recruitment?***</b> | <b>Appropriate indicators of SES?+</b> | <b>NCNP use?++</b> | <b>Data analysis appropriate?+++</b> | <b>Adequate study power? **+++</b> | <b>Confounding factors taken into account?****</b> | <b>Generalisability<sub>H</sub></b> | <b>Quality appraisal</b> |
|---------------------------|----------------------------------|------------------------|----------------------------------------|--------------------|--------------------------------------|------------------------------------|----------------------------------------------------|-------------------------------------|--------------------------|
| Rodu and Cole 2009        | No                               | Unclear                | Yes                                    | Yes                | Partially                            | Partially                          | Unclear                                            | National                            | Medium                   |
| Romito and Saxton 2014    | No                               | Partially              | Partially                              | Yes                | No                                   | No                                 | Unclear                                            | Not generalisable                   | Low                      |
| Syamlal et al 2016 (EC)   | No                               | Partially              | Yes                                    | Yes                | Yes                                  | Yes                                | Yes                                                | Subpopulation                       | Medium                   |
| Syamlal et al 2016 (SLT)  | Yes                              | Yes                    | Yes                                    | Partially          | Yes                                  | Yes                                | Unclear                                            | National                            | Medium                   |
| Sung et al 2016           | Yes                              | Partially              | Yes                                    | Yes                | Yes                                  | Yes                                | Yes                                                | National                            | Medium                   |
| Thorne et al 2010         | Yes                              | Yes                    | Yes                                    | Yes                | Yes                                  | Partially                          | Yes                                                | National                            | Medium                   |
| Vijayaraghavan et al 2014 | Yes                              | Yes                    | Yes                                    | Partially          | Yes                                  | Yes                                | Yes                                                | National                            | Medium                   |
| *Wang et al 1994          | Yes                              | Yes                    | Unclear                                | Yes                | Partially                            | Unclear                            | No                                                 | National, Subpopulation             | Low                      |
| *Wang et al 1998          | Yes                              | Yes                    | Partially                              | Yes                | Partially                            | Partially                          | Unclear                                            | National, Subpopulation             | Low                      |
| Weaver et al 2015         | Yes                              | Yes                    | Yes                                    | Yes                | Partially                            | Partially                          | No                                                 | National                            | Low                      |

| <b>Study</b>         | <b>Tobacco products by SES?*</b> | <b>Recruitment? **</b> | <b>Appropriate indicators of SES? +</b> | <b>NCNP use? ++</b> | <b>Data analysis appropriate? +++</b> | <b>Adequate study power? **++</b> | <b>Confounding factors taken into account? ***</b> | <b>Generalisability ±</b> | <b>Quality appraisal</b> |
|----------------------|----------------------------------|------------------------|-----------------------------------------|---------------------|---------------------------------------|-----------------------------------|----------------------------------------------------|---------------------------|--------------------------|
| White et al 2016     | Yes                              | Yes                    | Yes                                     | Yes                 | Yes                                   | Yes                               | Yes                                                | National                  | High                     |
| Wilson and Wang 2016 | No                               | Yes                    | Yes                                     | Yes                 | Yes                                   | Partially                         | Yes                                                | National                  | Medium                   |
| *Wills et al 2016    | Yes                              | Yes                    | Yes                                     | Yes                 | Yes                                   | Yes                               | Yes                                                | Subpopulation             | Medium                   |

### Quality Appraisal Guide

\* Does the methodology allow us to assess use of combustible tobacco products (cigarettes) by SES?

\*\* Was the recruitment strategy appropriate?

+ Did the study include appropriate indicators of SES?

++ Did the study include a relevant measure of NCNP use or impact?

+++ Were the methods of data analysis appropriate?

\*\*++ Was the study adequately powered to assess differences by SES?

\*\*\* Have the authors taken into account any potential confounding factors, including age?

± Can the findings be generalised, and – if so – to what level?

Studies to be categorised as Medium if any:

Appropriate indicators of SES = Partially (in most cases due to binary measure, ie high income vs low income)

AND/OR

NCNP use = Partially (in most cases due to ever use being only measure)

AND/OR

Confounding factors taken into account = Partially (in most cases because age has not been taken into consideration)

AND/OR

Recruitment = Partially (in most cases due low response rate, high attrition, or problems with sample selection)

AND/OR

Data analysis = Partially

AND/OR

Study power = Partially (is study adequately powered to assess differences by SES)

AND/OR

Generalisability = Partially (ie subpopulation)

Studies to be categorised as Low if any:

Appropriate indicators of SES = No (in most cases due to binary measure, ie high income vs low income)

AND/OR

NCNP use = No (in most cases due to ever use being only measure)

AND/OR

Confounding factors taken into account = No (in most cases because age has not been taken into consideration)

AND/OR

Recruitment = No (in most cases due low response rate, high attrition, or problems with sample selection)

AND/OR

Data analysis = No

AND/OR

Study power = Partially (is study adequately powered to assess differences by SES)

AND/OR

Generalisability = No (not generalisable)

Factors only indicative of quality for studies on young people:

Tobacco product by SES = No (study offers no data for combustible tobacco use among sample by SES or offers only dual use data with no baseline characteristics)

Notes

\* Due to the nature of tobacco use patterns among young people being unpredictable many of the studies on young people were marked lower in quality than the rating criteria above might suggest.

\*\* In some cases the number of partially or unclear markers has led to study quality to be assessed as Low.
