# Supplementary material for: Potential for non-combustible nicotine products to reduce socioeconomic inequalities in smoking: a systematic review and synthesis of best available evidence
Source: PubMed Central journal article supplement (PMC6836524; doi:10.1186/s12889-019-7836-4), 2019-11-06
Supplement: 12889_2019_7836_MOESM6_ESM.pdf [file 12889_2019_7836_MOESM6_ESM.pdf]

## Additional File 6. Potential equity outcome tables

Paper: Potential for non-combustible nicotine products to reduce socioeconomic inequalities in smoking: a systematic review and synthesis of best available evidence.

Authors: Mark Lucherini, Sarah Hill, Katherine Smith

Tables:

- Table 1: Studies included in adult e-cigarette best evidence synthesis
- Table 2: All other adult e-cigarettes studies (not included in adults best evidence synthesis)
- Table 3: Young people and e-cigarette studies
- Table 4: Studies included in adult smokeless tobacco best evidence synthesis
- Table 5: All other adult SLT studies (not included in adults best evidence synthesis)
- Table 6: Young people and smokeless tobacco studies
- Table 7: All nicotine replacement therapy studies

**Table 1: Studies included in adult e-cigarette best evidence synthesis**

| Study                   | Data collection | Location    | Study size | Measure(s) of SES  | Main findings by SES measure(s) for EC** | Potential impact on smoking inequalities - Current Use | Potential impact on smoking inequalities - Ever Use | Evidence Tier | Quality Appraisal |
|-------------------------|-----------------|-------------|------------|--------------------|------------------------------------------|--------------------------------------------------------|-----------------------------------------------------|---------------|-------------------|
| Brown et al. 2014       | 2012            | UK, England | 3538       | Occupational group | high > low                               | Negative                                               | None                                                | 3             | M                 |
| Carrieri and Jones 2016 | 2013            | UK, England | 1697       | EDU, INC           | INC high > low<br>EDU high > low         | None                                                   | Negative (EDU, INC)                                 | 3             | M                 |

| <b>Study</b>                              | <b>Data collection</b> | <b>Location</b> | <b>Study size</b> | <b>Measure(s) of SES</b> | <b>Main findings by SES measure(s) for EC**</b>                                 | <b>Potential impact on smoking inequalities - Current Use</b> | <b>Potential impact on smoking inequalities - Ever Use</b> | <b>Evidence Tier</b> | <b>Quality Appraisal</b> |
|-------------------------------------------|------------------------|-----------------|-------------------|--------------------------|---------------------------------------------------------------------------------|---------------------------------------------------------------|------------------------------------------------------------|----------------------|--------------------------|
| Huang et al. 2016                         | 2013                   | US              | 17522             | EDU, INC                 | EDU low > high (CU).<br>EDU unclear (EU)<br>INC unclear (CU, EU).               | Unclear (INC)<br>Positive (EDU)                               | Unclear (EDU, INC)                                         | 1                    | H                        |
| Hu et al. 2016 (also included in table 4) | 2013-2014              | US              | 26437             | EDU, INC                 | EDU unclear<br>INC low > high                                                   | Positive (INC)<br>Unclear (EDU)                               | None                                                       | 1                    | M                        |
| Pearson et al. 2012                       | 2010                   | US              | 1308<br>3239*     | EDU                      | EDU high > low                                                                  | None                                                          | Negative                                                   | 3                    | M                        |
| Syamlal et al. 2016                       | 2014                   | US              | 146342            | EDU, INC                 | INC low > high<br>EDU low = high                                                | Positive (INC)<br>Neutral (EDU)                               | None                                                       | 2                    | M                        |
| Wilson and Wang 2016                      | 2014                   | US              | 34356             | EDU, INC                 | EDU unclear (CU)<br>INC unclear (CU)<br>EDU unclear (EU)<br>INC high > low (EU) | Unclear (EDU, INC)                                            | Unclear (EDU)<br>Negative (INC)                            | 3                    | M                        |

\*Two samples considered separately but use following similar gradient for each.

\*\*EC, e-cigarettes; EDU, education; INC, income; CU, current use; EU, ever use

**Table 2: All other adult e-cigarettes studies (not included in adults best evidence synthesis)**

| <b>Study</b>                                 | <b>Data collection</b> | <b>Location</b> | <b>Study size</b> | <b>Measure(s) of SES</b> | <b>Main findings by SES measure(s) for EC**</b> | <b>Potential impact on smoking inequalities - Current use</b> | <b>Potential impact on smoking inequalities - Ever Use</b> | <b>Evidence Tier</b> | <b>Quality Appraisal</b> |
|----------------------------------------------|------------------------|-----------------|-------------------|--------------------------|-------------------------------------------------|---------------------------------------------------------------|------------------------------------------------------------|----------------------|--------------------------|
| Agaku et al. 2014 (also included in table 5) | 2012-2013              | US              | 27026             | EDU, INC                 | EDU low = high<br>INC low = high                | Unclear (EDU, INC, EC)                                        | None                                                       | 4                    | L                        |
| Chivers et al 2016                           | 2014                   | US              | 800               | EDU                      | EDU low > high                                  | Positive                                                      | None                                                       | 3                    | L                        |
| Christensen et al 2014                       | 2012-2013              | US, Kansas      | 9656              | EDU, INC                 | INC high > low<br>EDU low > high                | None                                                          | Negative (INC)<br>Positive (EDU)                           | 3                    | L                        |
| Douptcheva et al 2013                        | 2010-2013              | Switzerland     | 5081              | EDU                      | EDU low > high                                  | None                                                          | Positive                                                   | 4                    | L                        |
| Gallus et al. 2014                           | 2013                   | Italy           | 3000              | EDU                      | EDU unclear                                     | None                                                          | Unclear                                                    | 4                    | L                        |

| <b>Study</b>                                    | <b>Data collection</b>       | <b>Location</b> | <b>Study size</b>                 | <b>Measure(s) of SES</b> | <b>Main findings by SES measure(s) for EC**</b>                                    | <b>Potential impact on smoking inequalities - Current use</b> | <b>Potential impact on smoking inequalities - Ever Use</b> | <b>Evidence Tier</b> | <b>Quality Appraisal</b> |
|-------------------------------------------------|------------------------------|-----------------|-----------------------------------|--------------------------|------------------------------------------------------------------------------------|---------------------------------------------------------------|------------------------------------------------------------|----------------------|--------------------------|
| King et al. 2013                                | 2010<br>2011                 | US              | 4050<br>4184<br>2125*             | EDU, INC                 | EDU unclear<br>INC unclear                                                         | None                                                          | Unclear (EDU, INC)                                         | 4                    | L                        |
| King et al. 2015                                | 2010<br>2011<br>2012<br>2013 | US              | 2,502<br>4,050<br>4,170<br>4,033* | EDU, INC                 | EDU low = high (CU)<br>INC unclear (CU)<br>EDU unclear (EU)<br>INC low = high (EU) | Neutral (EDU)<br>Unclear (INC)                                | Unclear (EDU)<br>Neutral (INC)                             | 4                    | M                        |
| McMillen et al. 2012 (also included in table 5) | 2010                         | US              | 3240                              | EDU                      | EDU unclear                                                                        | None                                                          | Unclear                                                    | 4                    | L                        |
| Regan et al. 2013                               | 2010                         | US              | 10328                             | EDU, INC                 | EDU low > high (CU, EU)<br>INC low > high (EU)<br>INC low = high (CU)              | Positive (EDU)<br>Neutral (INC)                               | Positive (EDU, INC)                                        | 2                    | L                        |
| Weaver et al. 2016                              | 2014                         | US              | 5717                              | EDU, INC                 | INC low > high (CU, EU)<br>EDU low = high (CU, EU)                                 | Positive (INC)<br>Neutral (EDU)                               | Positive (INC)<br>Neutral (EDU)                            | 1                    | L                        |

\*Each sample considered separately but use following similar gradient for each.

\*\*EC, e-cigarettes; EDU, education; INC, income; CU, current use; EU, ever use

**Table 3: Young people and e-cigarette studies**

| <b>Authors</b>       | <b>Data collection</b> | <b>Location</b>        | <b>Study size</b> | <b>Measure(s) of SES</b>  | <b>Main findings by SES measure(s) for EC*</b> | <b>Main findings for combustible tobacco use (general SES)</b> | <b>Potential impact on smoking inequalities - Current Use</b> | <b>Potential impact on smoking inequalities - Ever Use</b> | <b>Evidence Tier</b> | <b>Critical Appraisal</b> |
|----------------------|------------------------|------------------------|-------------------|---------------------------|------------------------------------------------|----------------------------------------------------------------|---------------------------------------------------------------|------------------------------------------------------------|----------------------|---------------------------|
| Babineau et al. 2016 | 2014                   | Ireland                | 821               | Neighbourhood deprivation | low deprivation > high (EU)<br>unclear (CU)    | No data                                                        | Positive                                                      | Unclear                                                    | 3                    | L                         |
| Khoury et al. 2016   | 203-2014               | Canada Niagara region  | 2367              | INC                       | INC low > high                                 | No data                                                        | None                                                          | Positive                                                   | 3                    | L                         |
| Kinnunen et al. 2016 | 2013-2015              | Finland                | 13369 (pooled)    | EDU                       | EDU low > high (EU)<br>EDU unclear (CU)        | No data                                                        | Positive                                                      | Unclear                                                    | 2                    | M                         |
| Rennie et al. 2016   | 2014-2015              | France, Hauts-de-Seine | 1486              | Composite index           | high > low                                     | High > low                                                     | None                                                          | Unclear                                                    | 3                    | M                         |
| Wills et al. 2016    | 2013-2014              | US, Hawaii             | 2338              | EDU                       | EDU low > high                                 | Low = high                                                     | Unclear                                                       | None                                                       | 3                    | M                         |

\*EC, e-cigarette; EDU, education; INC, income; CU, current use; EU, ever use

**Table 4: Studies included in adult smokeless tobacco best evidence synthesis**

| <b>Authors</b>                            | <b>Data collection</b> | <b>Location</b>          | <b>Study size</b> | <b>Measure(s) of SES</b> | <b>Main findings by SES measure(s) for SLT**</b> | <b>Potential impact on smoking inequalities - Current Use</b> | <b>Potential impact on smoking inequalities - Ever use</b> | <b>Evidence Tier</b> | <b>Critical Appraisal</b> |
|-------------------------------------------|------------------------|--------------------------|-------------------|--------------------------|--------------------------------------------------|---------------------------------------------------------------|------------------------------------------------------------|----------------------|---------------------------|
| Accortt et al. 2005                       | 1971-1975              | US                       | 12172             | EDU, INC                 | EDU low > high<br>INC low > high                 | None                                                          | Positive (EDU, INC)                                        | 2                    | M                         |
| Biener et al. 2011                        | 2008                   | US                       | 4067              | EDU                      | EDU low > high                                   | None                                                          | Positive                                                   | 3                    | M                         |
| Chang et al 2016                          | 1992-2011              | US                       | Unclear           | EDU, INC                 | EDU low > high<br>INC low = high                 | Positive (EDU)<br>Neutral (INC)                               | None                                                       | 2                    | M                         |
| Engstrom et al. 2010                      | 2006                   | Sweden, Stockholm County | 34707             | EDU, INC,                | EDU low > high<br>INC unclear                    | Positive (EDU)<br>Unclear (INC)                               | None                                                       | 3                    | M                         |
| Hu et al. 2016 (also included in table 1) | 2013-2014              | US                       | 26437             | EDU, INC                 | EDU low > high<br>INC low = high                 | Positive (EDU)<br>Neutral (INC)                               | None                                                       | 1                    | M                         |
| Kvaavik et al. 2016                       | 2011-2012              | Norway                   | 13756             | EDU                      | EDU low > high                                   | None                                                          | Positive                                                   | 3                    | M                         |
| Mazurek et al. 2014                       | 2005-2010              | US                       | 19445<br>15649    | EDU, INC                 | EDU low > high<br>INC low = high                 | Neutral (INC)<br>Positive (EDU)                               | None                                                       | 1                    | M                         |

| <b>Authors</b>             | <b>Data collection</b>                        | <b>Location</b>              | <b>Study size</b> | <b>Measure(s) of SES</b> | <b>Main findings by SES measure(s) for SLT**</b> | <b>Potential impact on smoking inequalities - Current Use</b> | <b>Potential impact on smoking inequalities - Ever use</b> | <b>Evidence Tier</b> | <b>Critical Appraisal</b> |
|----------------------------|-----------------------------------------------|------------------------------|-------------------|--------------------------|--------------------------------------------------|---------------------------------------------------------------|------------------------------------------------------------|----------------------|---------------------------|
| Mushtaq et al. 2012        | 2010                                          | US                           | 169487            | EDU, INC                 | EDU low > high<br>INC low > high                 | Positive (INC, EDU)                                           | None                                                       | 1                    | M                         |
| Norberg et al. 2011        | 1990-2006                                     | Sweden, Vasterbotten County  | 92563             | EDU, INC                 | INC low = high<br>EDU unclear                    | None                                                          | Neutral (INC)<br>Unclear (EDU)                             | 2                    | M                         |
| Novotny et al. 1989        | 1986                                          | US                           | 6377              | INC, EDU                 | EDU low > high<br>INC low > high                 | Positive (EDU, INC)                                           | Positive (EDU, INC)                                        | 2                    | M                         |
| Rodu and Cole. 2009        | 2005                                          | US                           | 103709            | EDU, INC                 | EDU low > high<br>INC unclear                    | Positive (EDU)<br>Neutral (INC)                               | None                                                       | 2                    | M                         |
| Syamlal et al. 2016        | 2012-2014                                     | US                           | 61402             | EDU, INC                 | EDU low > high<br>INC unclear                    | Positive (EDU)<br>Unclear (INC)                               | None                                                       | 1                    | M                         |
| Sung et al. 2016           | 1998<br>2000<br>2005<br>2010<br>(pooled data) | US                           | 117816            | EDU, INC                 | EDU low > high<br>INC low = high                 | Positive (EDU)<br>Neutral (INC)                               | None                                                       | 1                    | M                         |
| Thorne et al 2010          | 2008                                          | US, 13 states across country | ~400349           | EDU, INC                 | EDU low > high<br>INC low = high                 | Positive (EDU)<br>Neutral (INC)                               | None                                                       | 1                    | M                         |
| Vijayaraghavan et al. 2014 | 2006-2012                                     | US                           | 54239             | EDU, INC                 | EDU low > high<br>INC unclear                    | None                                                          | Unclear (INC)<br>Positive (EDU)                            | 3                    | M                         |

| <b>Authors</b>    | <b>Data collection</b> | <b>Location</b> | <b>Study size</b> | <b>Measure(s) of SES</b> | <b>Main findings by SES measure(s) for SLT**</b> | <b>Potential impact on smoking inequalities - Current Use</b> | <b>Potential impact on smoking inequalities - Ever use</b> | <b>Evidence Tier</b> | <b>Critical Appraisal</b> |
|-------------------|------------------------|-----------------|-------------------|--------------------------|--------------------------------------------------|---------------------------------------------------------------|------------------------------------------------------------|----------------------|---------------------------|
| White et al. 2016 | 2012                   | US              | 37869             | EDU, INC                 | EDU low > high<br>INC low = high                 | Positive (EDU)<br>Neutral (INC)                               | None                                                       | 3                    | H                         |

\*Each sample considered separately but use following similar gradient for each.

\*\*SLT, smokeless tobacco; EDU, education; INC, income; CU, current use; EU, ever use

**Table 5: All other adult smokeless tobacco studies (not included in adults best evidence synthesis)**

| <b>Authors</b>                               | <b>Data collection</b>             | <b>Location</b> | <b>Study size</b>                   | <b>Measure(s) of SES</b> | <b>Main findings by SES measure(s) for SLT*</b> | <b>Potential impact on smoking inequalities - Current Use</b> | <b>Potential impact on smoking inequalities - Ever Use</b> | <b>Evidence Tier</b> | <b>Critical Appraisal</b> |
|----------------------------------------------|------------------------------------|-----------------|-------------------------------------|--------------------------|-------------------------------------------------|---------------------------------------------------------------|------------------------------------------------------------|----------------------|---------------------------|
| Agaku et al. 2014 (also included in table 2) | 2012-2013                          | US              | 27026                               | EDU, INC                 | EDU low = high<br>INC low = high                | Neutral (EDU, INC)                                            | None                                                       | 4                    | L                         |
| Backinger et al. 2008                        | 1995/95<br>1998<br>2000<br>2001/02 | US              | 43232<br>134481<br>26216<br>37210** | EDU, INC                 | EDU low > high<br>INC low = high                | None                                                          | Positive (EDU)<br>Neutral (INC)                            | 3                    | L                         |
| Bhattacharyya. 2012                          | 2000<br>2005<br>2010               | US              | 86270<br>(pooled)                   | EDU, INC                 | EDU low > high<br>INC unclear                   | Positive (EDU)<br>Unclear (INC)                               | None                                                       | 3                    | L                         |
| McMillen et al. 2012 (also                   | 2010                               | US              | 3240                                | EDU                      | EDU low = high                                  | None                                                          | Neutral                                                    | 4                    | L                         |



| <b>Authors</b>          | <b>Data collection</b> | <b>Location</b>                           | <b>Study size</b>             | <b>Measure(s) of SES</b> | <b>Main findings by SES measure(s) for SLT*</b> | <b>Potential impact on smoking inequalities - Current Use</b> | <b>Potential impact on smoking inequalities - Ever Use</b> | <b>Evidence Tier</b> | <b>Critical Appraisal</b> |
|-------------------------|------------------------|-------------------------------------------|-------------------------------|--------------------------|-------------------------------------------------|---------------------------------------------------------------|------------------------------------------------------------|----------------------|---------------------------|
| included in table 2)    |                        |                                           |                               |                          |                                                 |                                                               |                                                            |                      |                           |
| Nelson et al. 1996      | 1992-1993              | US, Iowa, Montana, West Virginia, Indiana | 1853<br>1549<br>1007<br>1826* | EDU                      | EDU low > high                                  | Positive                                                      | None                                                       | 4                    | L                         |
| Roberts et al. 2016     | 2013-2013              | US                                        | 136147                        | INC                      | INC unclear                                     | Unclear                                                       | None                                                       | 4                    | L                         |
| Romito and Saxton. 2014 | 2010                   | US, Indiana                               | 472                           | EDU                      | EDU unclear                                     | None                                                          | Unclear                                                    | 2                    | L                         |

\*SLT, smokeless tobacco; EDU, education; INC, income; CU, current use; EU, ever use

\*\*Sample considered separately in analysis in paper but all followed same pattern for prevalence of use

**Table 6: Young people and smokeless tobacco studies**

| <b>Authors</b>  | <b>Data collection</b> | <b>Location</b>    | <b>Participants</b> | <b>Study size</b> | <b>Measure(s) of SES</b> | <b>Main findings by SES measure(s) for SLT***</b> | <b>Main findings for combustible tobacco use (general SES)</b> | <b>Potential impact on smoking inequalities - Current Use</b> | <b>Potential impact on smoking inequalities - Ever Use</b> | <b>Evidence Tier</b> | <b>Critical Appraisal</b> |
|-----------------|------------------------|--------------------|---------------------|-------------------|--------------------------|---------------------------------------------------|----------------------------------------------------------------|---------------------------------------------------------------|------------------------------------------------------------|----------------------|---------------------------|
| Hill et al 1992 | Unclear                | US, North Carolina | 10-14 years         | 2020              | EDU                      | EDU unclear (CU)<br>EDU low = high (EU)           | No data                                                        | Unclear                                                       | Unclear                                                    | 3                    | L                         |

| <b>Authors</b>           | <b>Data collection</b> | <b>Location</b> | <b>Participants</b> | <b>Study size</b> | <b>Measure(s) of SES</b> | <b>Main findings by SES measure(s) for SLT***</b> | <b>Main findings for combustible tobacco use (general SES)</b> | <b>Potential impact on smoking inequalities - Current Use</b> | <b>Potential impact on smoking inequalities - Ever Use</b> | <b>Evidence Tier</b> | <b>Critical Appraisal</b> |
|--------------------------|------------------------|-----------------|---------------------|-------------------|--------------------------|---------------------------------------------------|----------------------------------------------------------------|---------------------------------------------------------------|------------------------------------------------------------|----------------------|---------------------------|
| Fischer et al. 2014      | 2012                   | Switzerland     | mean age 19.5, men  | 5270              | EDU, INC                 | EDU low > high<br>INC unclear                     | No data                                                        | Positive (EDU)<br>Unclear (INC)                               | None                                                       | 3                    | M                         |
| Grotvedt et al. 2008     | 2000-2004              | Norway          | 14-18               | 15931             | EDU, INC                 | INC unclear<br>EDU low > high                     | low > high                                                     | Positive (EDU)<br>Unclear (INC)                               | None                                                       | 1                    | M                         |
| Overland et al. 2010     | 2004, 2007             | Norway          | 16-20               | 4815 (pooled)     | EDU                      | EDU low = high                                    | low > high                                                     | Neutral                                                       | None                                                       | 1                    | M                         |
| Pedersen et al. 2014     | 2010                   | Norway          | 16-17               | 2796              | EDU, INC                 | EDU unclear<br>INC unclear                        | Unclear                                                        | Unclear (EDU, INC)                                            | None                                                       | 3                    | L                         |
| Pedersen and Bakken 2016 | 2012                   | Norway, Oslo    | 15-17               | 6508              | Composite index          | high > low                                        | Low > high                                                     | Negative                                                      | None                                                       | 3                    | H                         |
| Wang et al. 1994*        | 1989                   | US              | 12-18 years         | 6599              | INC                      | INC high > low                                    | Low = high                                                     | Unclear                                                       | None                                                       | 4                    | L                         |

| <b>Authors</b>   | <b>Data collection</b> | <b>Location</b> | <b>Participants</b> | <b>Study size</b> | <b>Measure(s) of SES</b> | <b>Main findings by SES measure(s) for SLT***</b> | <b>Main findings for combustible tobacco use (general SES)</b> | <b>Potential impact on smoking inequalities - Current Use</b> | <b>Potential impact on smoking inequalities - Ever Use</b> | <b>Evidence Tier</b> | <b>Critical Appraisal</b> |
|------------------|------------------------|-----------------|---------------------|-------------------|--------------------------|---------------------------------------------------|----------------------------------------------------------------|---------------------------------------------------------------|------------------------------------------------------------|----------------------|---------------------------|
| Wang et al. 1998 | 1993                   | US              | 12-18 years         | 8725              | EDU, INC                 | INC high > low (CU, EU)<br>EDU unclear (CU, EU)   | Unclear                                                        | Unclear (EDU, INC)                                            | Unclear (EDU, INC)                                         | 4                    | L                         |

\*Uses data from same survey as Wang et al 1998, but samples collected in different years.

\*\*\*SLT, smokeless tobacco; EDU, education; INC, income; CU, current use; EU, ever use

**Table 7: All nicotine replacement therapy studies**

| <b>Authors</b>     | <b>Data collection</b>       | <b>Location</b>       | <b>Study size</b> | <b>Measure(s) of SES</b> | <b>Main findings by SES measure(s) for NRT***</b> | <b>Potential impact on smoking inequalities - Current Use</b> | <b>Potential impact on smoking inequalities - Ever Use</b> | <b>Evidence Tier</b> | <b>Critical Appraisal</b> |
|--------------------|------------------------------|-----------------------|-------------------|--------------------------|---------------------------------------------------|---------------------------------------------------------------|------------------------------------------------------------|----------------------|---------------------------|
| Alberg et al. 2005 | 1998                         | US, Washington County | 1954              | EDU                      | High EDU > low EDU                                | None                                                          | Positive                                                   | 3                    | L                         |
| Clare et al. 2014  | 2001<br>2004<br>2007<br>2010 | Australia             | 23402 (pooled)    | EDU, INC                 | INC high > low<br>EDU unclear                     | Neutral (SEIFA)<br>Unclear (EDU)<br>Negative (INC)*           | None                                                       | 3                    | M                         |

|                     |           |             |      |                    |                                  |                      |      |   |   |
|---------------------|-----------|-------------|------|--------------------|----------------------------------|----------------------|------|---|---|
| Kotz and West. 2009 | 2006-2008 | UK, England | 6950 | Occupational group | low = high                       | Neutral*             | None | 3 | M |
| Kushnir et al. 2017 | Unclear   | Canada      | 500  | EDU, INC           | EDU low > high<br>INC low > high | Neutral (EDU, INC)** | None | 3 | L |

\*Use for cessation in the last year.

\*\*Use for cessation over a five week period.

\*\*\*EDU, education; INC, income; CU, current use; EU, ever use
